# Supplementary material for: Integrated Analysis of Transcriptome and Metabolome Provides Insight into Camellia oleifera Oil Alleviating Fat Accumulation in High-Fat Caenorhabditis elegans
Source: MDPI journal article supplement (doi:10.3390/ijms241411615), 2023-07-19
Supplement: s1 [file s1]

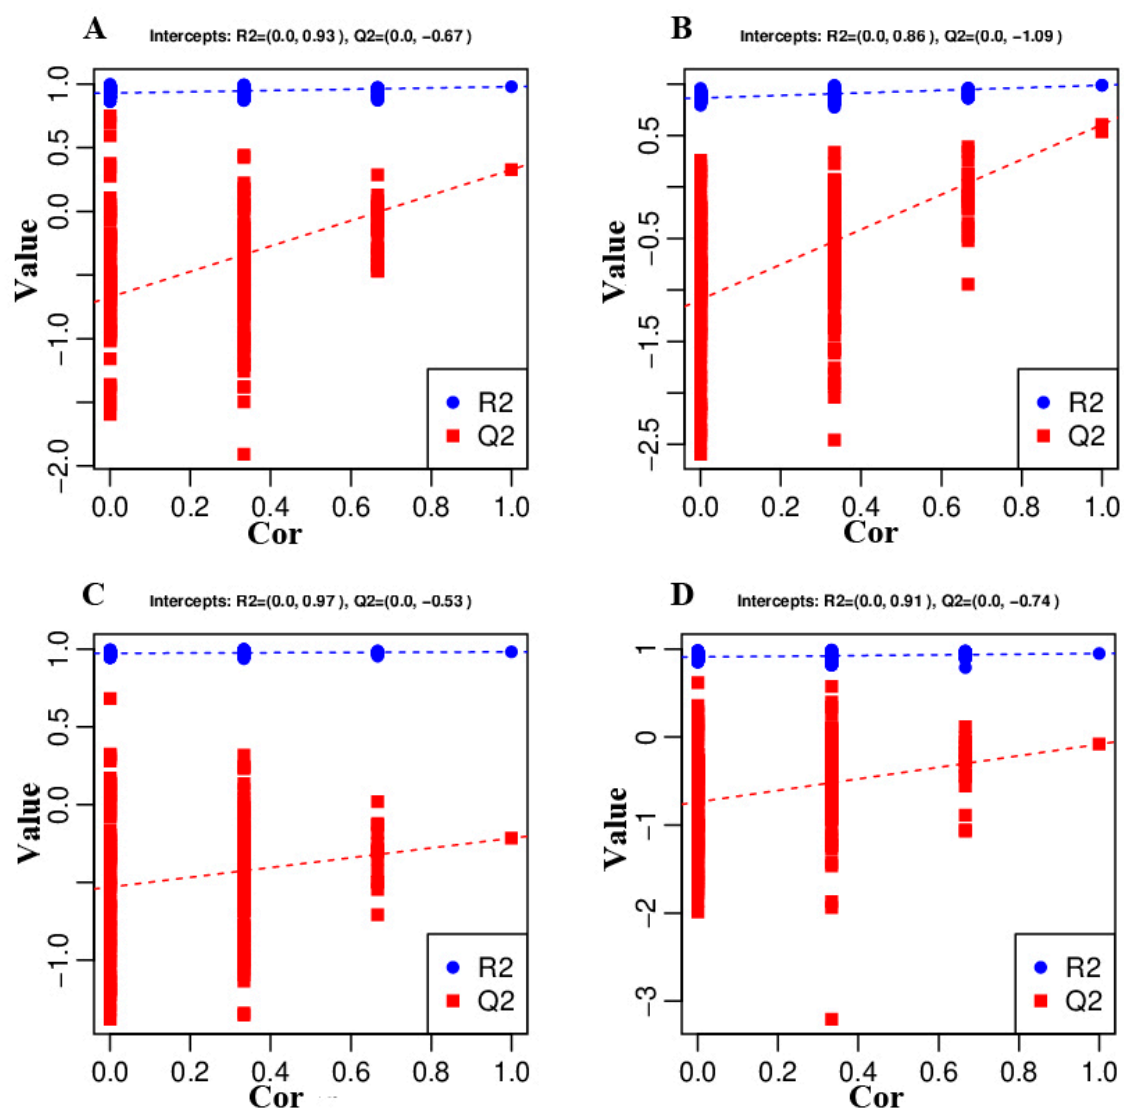

**Figure S1.** The corresponding  $R^2$  and  $Q^2$  values of PLS-DA. (A) Glc/Control pos, (B) Glc/Control neg, (C) Glc-CO/Glc pos, (D) Glc-CO/Glc neg.
